# Supplementary material
Source: publisher site journal article supplement (https://www.dovepress.com/get_supplementary_file.php?f=402940.docx)
Supplement: Supplementary file 1 [file get_supplementary_file.php]

**Supplementary Data 1. Peripheral Morphology Grading System**

| **Cell Name** | **Grading System** | | |
| --- | --- | --- | --- |
| **Few/1+** | **Mod/2+, %** | **Many/3+, %** |
| **RBC** | | | |
| Anisocytosis | N/A | 11–20 | >20 |
| Macrocytes | N/A | 11–20 | >20 |
| Oval macrocytes | N/A | 2–5 | >5 |
| Microcytes | N/A | 11–20 | >20 |
| Hypochromic cells | N/A | 11–20 | >20 |
| Polychromasia | N/A | 5–20 | >20 |
| Acanthocytes | N/A | 5–20 | >20 |
| Bite cells | N/A | 1–2 | >2 |
| Blister cells | N/A | 1–2 | >2 |
| Echinocytes | N/A | 5–20 | >20 |
| Elliptocytes | N/A | 5–20 | >20 |
| Irregularly contracted cells | N/A | 1–2 | >2 |
| Ovalocytes | N/A | 5–20 | >20 |
| Schistocytes | <1% | 1–2 | >2 |
| Sickle cells | N/A | 1–2 | >2 |
| Spherocytes | N/A | 5–20 | >20 |
| Stomatocytes | N/A | 5–20 | >20 |
| Target cells | N/A | 5–20 | >20 |
| Teardrop cells | N/A | 5–20 | >20 |
| Basophilic stippling | N/A | 5–20 | >20 |
| Howell-Jolly bodies | N/A | 2–3 | >3 |
| Pappenheimer bodies | N/A | 2–3 | >3 |
| **WBC** | | | |
| Döhle bodies | N/A | 2–4 | >4 |
| Vacuolation (neutrophil) | N/A | 4–8 | >8 |
| Hypogranulation (neutrophil) | N/A | 4–8 | >8 |
| Hypergranulation (neutrophil) | N/A | 4–8 | >8 |
| **Platelets** | | | |
| Giant Platelets | N/A | 11–20 | >20 |

**Supplementary data 2: Consensus guidelines (rules) for slide review following CBC**

| **Rule #** | | **Parameter** | **primary** | **secondary** | **Tertiary** | **Action 1** | **Action 2** | **Action 3** |
| --- | --- | --- | --- | --- | --- | --- | --- | --- |
| 1 | | Neonates |  |  |  | Slide review |  |  |
| 5 | | WBC | <4 or >30 | First time |  | Slide review |  |  |
| 7 | | PLT | <100 or >1000 | First time |  | Slide review |  |  |
| 9 | | HGB | <7g/dl or >2g/dl above upper reference range for age and sex | First time |  | Slide review | Verify sample integrity if indicated |  |
| 10 | | MCV | <75fl or>105fl (adult) | First time | Specimen is<24 hrs old | Slide review |  |  |
| 11 | | MCV | >105fl | Adult | Specimen is>24hrs old | Slide review for macrocytic associated changes | Request fresh sample if NO macrocytic associated change | Report with comment if fresh sample is not available |
| 15 | | RDW | >22 | First time |  | Slide review |  |  |
| **DIFFERENTIAL** | | | | | | | | |
| 16 | No diff or incomplete diff | |  |  |  | Manual diff and slide review |  |  |
| 17 | Neut # | | <1 or >20 | First time |  | Slide review |  |  |
| 18 | Lymph # | | >5 (adult) or > 7 (<12 yrs) | First time |  | Slide review |  |  |
| 19 | Mono # | | >1.5 (adult) or >3 (<12yrs) | First time |  | Slide review |  |  |
| 20 | Eos # | | >2 | First time |  | Slide review |  |  |
| 21 | Baso # | | >0.5 | First time |  | Slide review |  |  |
| 22 | NRBC # | | Any value | First time |  | Slide review |  |  |
| 23 | Retics absolute # | | >0.100 | First time |  | Slide review |  |  |
| **SUSPECT FLAGS** | | | | | | | | |
| 24 | Suspect flag (except ImmG/Band) | | Flag + | First time | adult | Slide review |  |  |
| 25 | Suspect flag | | Flag + | First time | Child | Slide review |  |  |
| 27 | RBC fragment | | Flag + | any |  | Slide review |  |  |
| 28 | Dimorphic RBC | | Flag + | first time |  | Slide Review |  |  |
| 31 | Platelet Flags | | PLT & MPV flags except plt clumps |  |  | Slide Review |  |  |
| 32 | Immature granulocyte flag | | Flag + | first time |  | Slide Review |  |  |
| 35 | Atypical/Variant lymphs | | Flag + | first time |  | Slide Review |  |  |
| 37 | Blast flag | | Flag + | first time |  | Slide Review |  |  |
| 40 | NRBC flag | | Flag + |  |  | Slide Review | If positive, enumerate NRBC count, correct WBC if appropriate |  |
| 41 | Retics | | Abnormal pattern |  |  | Look at instrument output | Repeat if aspiration problem | If persists, review slide |
